# Supplementary material for: Wet-process feasible candlelight OLED
Source: Royal Society of Chemistry journal article supplement (doi:10.1039/c6tc01968d), 2016-01-01
Supplement: c6tc01968d1.pdf [file c6tc01968d1.pdf]

## Supporting information

### Wet process feasible candlelight OLED

Jwo-Huei Jou<sup>1\*</sup>, Yu-Ting Su<sup>1</sup>, Shih-Hao Liu<sup>1,2</sup>, Zhe-Kai He<sup>1</sup>, Snehasis Sahoo<sup>1</sup>, Hui-Huan Yu<sup>1</sup>, Sun-Zen Chen<sup>3</sup>, Ching-Wu Wang<sup>4</sup>, and Jia-Ren Lee<sup>2</sup>

<sup>1</sup>Department of Materials Science and Engineering, National Tsing Hua University, Taiwan

<sup>2</sup>Department of Physics, National Kaohsiung Normal University, Taiwan

<sup>3</sup>Center for Nanotechnology, Materials Science, and Microsystems, National Tsing Hua University, Taiwan

<sup>4</sup>Graduate Institute of Opto-Mechatronics, National Chung Cheng University, Taiwan

E-mail: [jjou@mx.nthu.edu.tw](mailto:jjou@mx.nthu.edu.tw)

The J-V-L graphs along with related discussions of all the reported OLEDs in this work are shown in figures S1-S5.

(a)

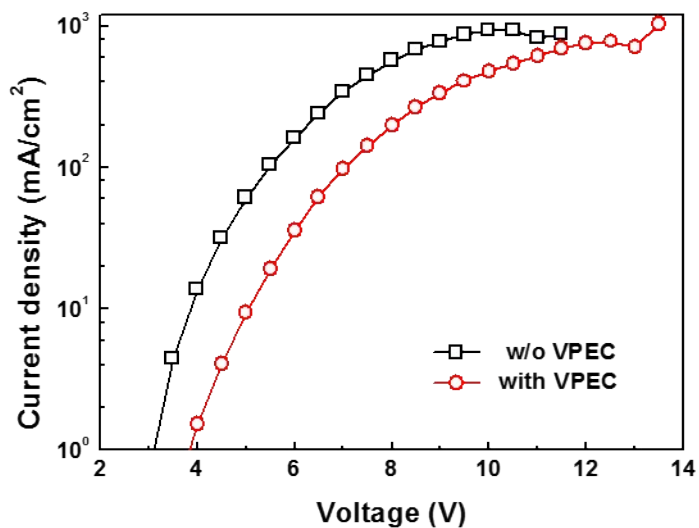

(b)

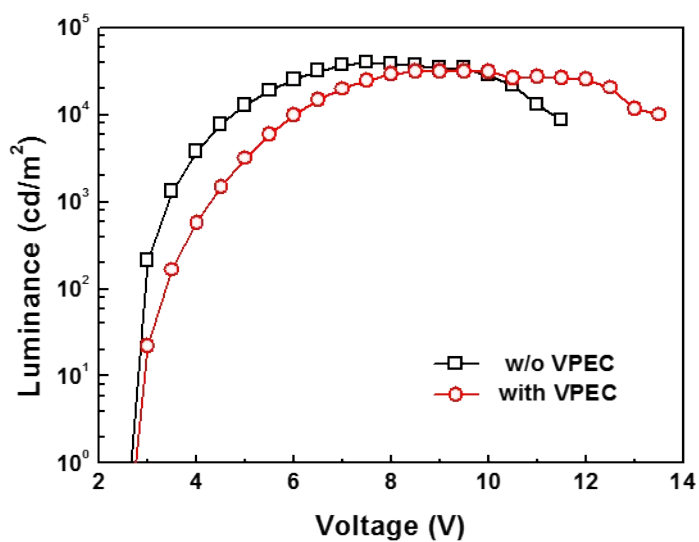

Figure S1. The effects of VPEC, HTL, incorporation on the (a) current density, and (b) luminance of the studied candlelight OLED.

(a)

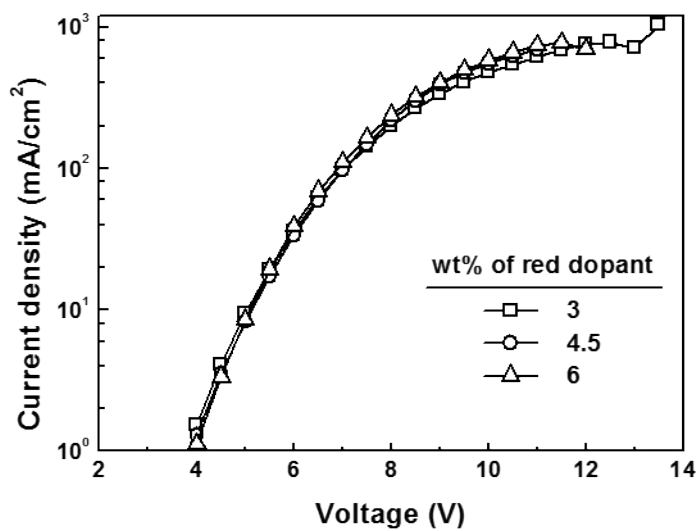

(b)

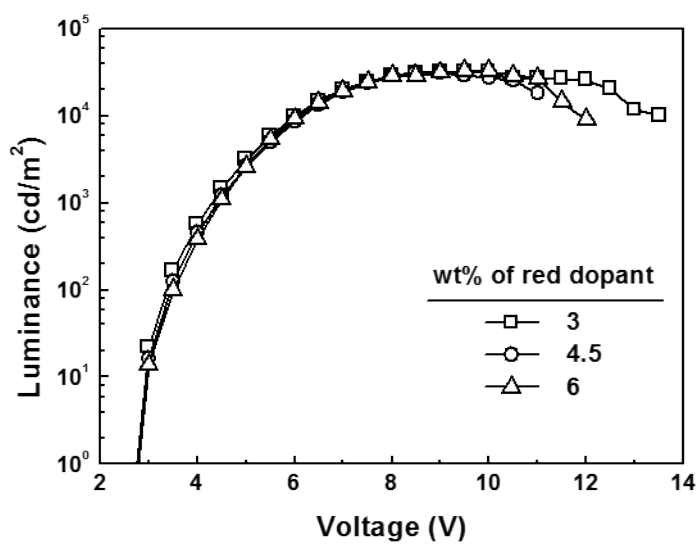

Figure S2. The effects of different red doping concentrations on the (a) current density, and (b) luminance of the studied candlelight OLED.

(a)

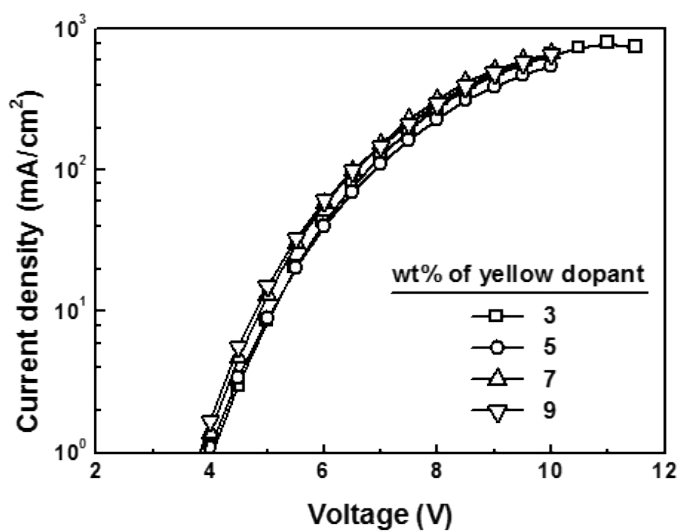

(b)

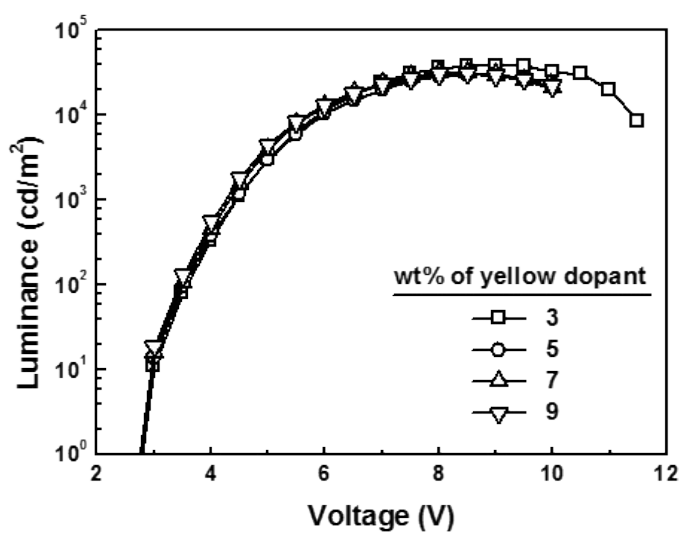

Figure S3. The effects of different yellow doping concentrations on the (a) current density, and (b) luminance of the studied candlelight OLED.

(a)

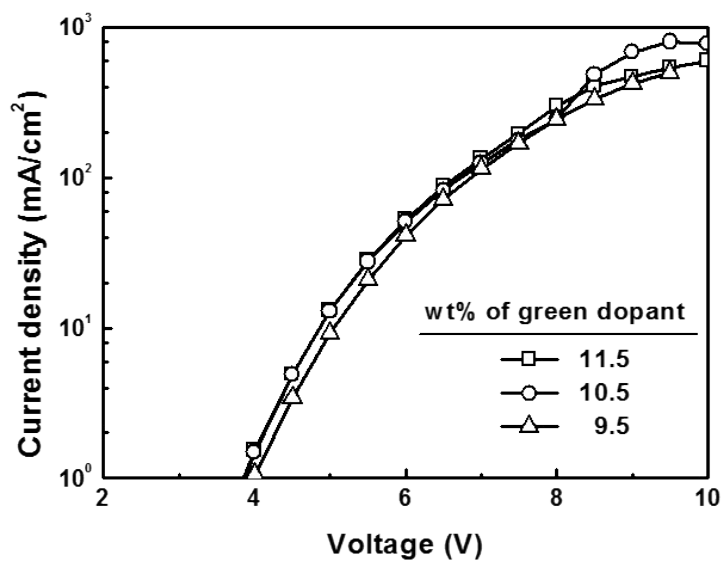

(b)

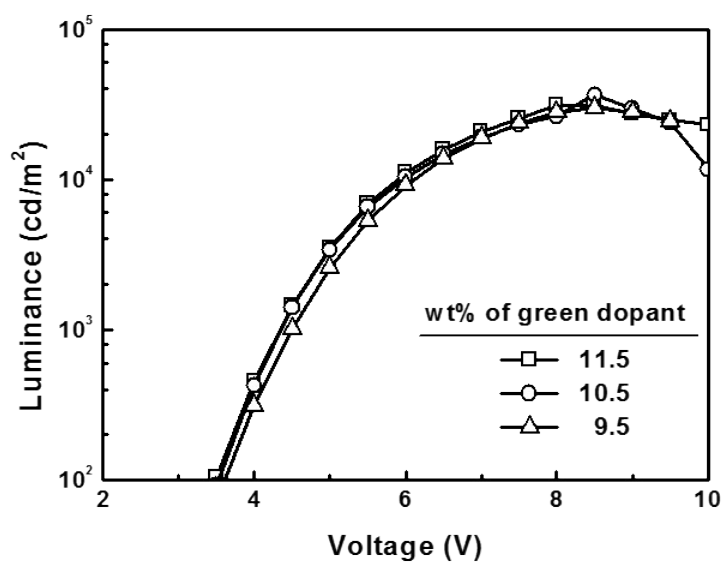

Figure S4. The effects of different yellow doping concentrations on the (a) current density, and (b) luminance of the studied candlelight OLED.

(a)

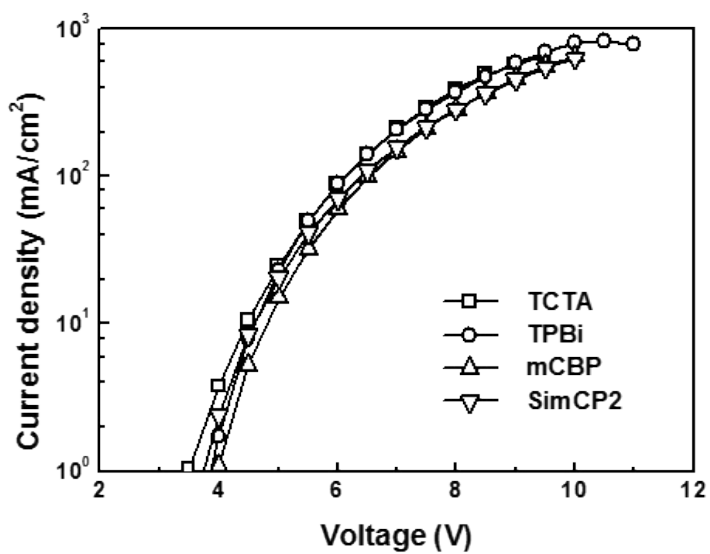

(b)

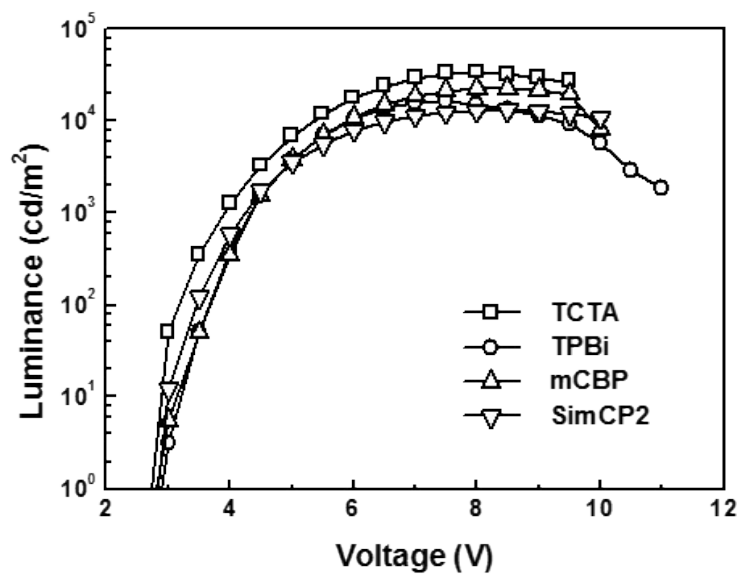

Figure S5. The host effects on the (a) current density, and (b) luminance of the studied candlelight OLED.
